# Supplementary material for: The Finnish Diabetes Prevention Study (DPS)
Source: Oxford University Press journal article supplement (doi:10.2337/diacare.26.12.3230), 2003-12-01
Supplement: 3230-sup-appendix.doc [file 3230-sup-appendix.doc]

| **Appendix. Intervention goals and their translation into practice** | | |
| --- | --- | --- |
| Risk factor | Goal | Translation |
| Overweight  (BMI > 25 kg/m2) | ≥5% reduction (or individually selected → 25 kg/m2) | - Substitute energy-dense foods and ingredients containing saturated fat, sugar, or alcohol with lower-energy items - Regular meal pattern with no more than 3-4 hours interval between meals - 'Plate model'* to estimate portion sizes - Increase physical activity - Participation in a 2-5 weeks VLCD group if desired and if weight reduction is not achieved at 6 months |
| Saturated fat intake | < 10 E% | - Non-fat dairy products instead of regular or high-fat - Low-fat cheese instead of regular or high-fat - Low-fat meat and meat products instead of regular or high-fat - Prepare meals by low-fat methods: cooking, baking instead of frying - Low-fat coffee-bread (buns, berry pasties) in moderation instead of high-fat (cookies, donuts, Danish pastries) |
| Total fat intake | < 30 E% (or <35 E% if the surplus is mono-unsaturated fat) | - As above - Soft rapeseed-oil based margarine in moderation on bread - Rapeseed-oil based salad dressing in moderation - Regular consumption of fish |
| Fiber | ≥15 g/1000 kcal | - Whole grain (rye) bread, porridge, muesli, oat and wheat bran, wholegrain pasta and rice instead of refined grains - Daily consumption of fruit, berries, and vegetables as such and as ingredients of warm dishes |
| Physical activity | > 30 min/day | - Physical activity incorporated into everyday life: walking or bicycling to work and shops, gardening, housework - Recreational moderate- or high-intensity physical activity: walking, skiing, ball games, aerobics, swimming - Supervised circuit-type resistance training program |

*National Nutrition Council. Finnish nutrition recommendations. Committee report. Helsinki: Ministry of Agriculture and Forestry; 1998. Report No.: 7
